# Supplementary material for: Correction: Talk2Me: Automated linguistic data collection for personal assessment
Source: PubMed Central journal article supplement (PMC6490913; doi:10.1371/journal.pone.0216375), 2019-04-30
Supplement: pone.0216375.s001.pdf [file pone.0216375.s001.pdf]

# Demographic Data

---

Please provide the following anonymous demographic data, which will aid the analysis of your results.

**1. Gender:**

Female

Male

Other :

**2. Date of birth (YYYY-MM-DD):**

**3. People in Canada come from many racial or cultural groups. You may belong to more than one group on the following list. Are you:**

White

Chinese

South Asian

Black

Filipino

Latin American

Southeast Asian

Arab

West Asian

Japanese

Korean

Aboriginal

Other

**4. Select all languages you can communicate in (speak, understand, read, and write), along with the level of fluency for each:**

**Language**

**Fluency**

---

English

Native

Fluent

Intermediate

Beginner

---

**Language****Fluency** French

- Native  
 Fluent  
 Intermediate  
 Beginner

- Native  
 Fluent  
 Intermediate  
 Beginner

Add Another Language

**5. Education level (highest completed, or currently being completed)**

- University - Doctoral Degree  
 University - Master's Degree  
 University - Undergraduate Degree  
 College  
 High School  
 Elementary School  
 None

**6. Have you ever been diagnosed with dementia? Please select any type of dementia with which you've been diagnosed. If you've never been diagnosed, please leave this section blank:**

- Alzheimer's disease (AD)  
 Vascular dementia (VD)  
 Mild cognitive impairment (MCI)  
 Dementia with Lewy Bodies (DLB)  
 Frontotemporal dementia (FTD)  
 Mixed dementia  
 Parkinson's disease (PD)  
 Other :

**7. Do you currently take any medications for dementia?**

- Yes  
 No

**8. Have you been a regular smoker (of tobacco) within the last 3 years?**

- Yes

No

**9. Country you were born in:**

**10. Country you currently reside in:**

Submit
